# Supplementary material
Source: publisher figshare collection journal article supplement (https://gsajournals.figshare.com/articles/dataset/_/7007981)
Supplement: Supplementary file 1 [file 1]

**Table S1:** List of *C. elegans* Strains

| Genotype                           | Strain Name | Reference                   |
|------------------------------------|-------------|-----------------------------|
| glh-1(ne4595[gfp::glh-1])I         | WM606       | (GHANTA <i>et al.</i> 2018) |
| wago-4(ne4479[gfp::wago-4])II      | WM610       | This study                  |
| sago-2(ne4480[gfp::sago-2])I       | WM611       | This study                  |
| ppw-1(ne4481[gfp::ppw-1])I         | WM609       | This study                  |
| gcna-1(ne4598[gfp::gcna-1])III     | WM613       | This study                  |
| dvc-1(ne4599[mcherry::dvc-1])V     | WM614       | This study                  |
| top-2(ne4600[top-2::mcherry])II    | WM615       | This study                  |
| wago-1(ne4435[3xflag::wago-1])I    | WM616       | This study                  |
| wago-2(ne4416[3xflag::wago-2])I    | WM617       | This study                  |
| ppw-2(ne4419[3xflag::ppw-2])I      | WM618       | This study                  |
| wago-4(ne4422[3xflag::wago-4])II   | WM619       | This study                  |
| wago-5(ne4427[3xflag::wago-5])II   | WM620       | This study                  |
| sago-2(ne4478[3xflag::sago-2])I    | WM621       | This study                  |
| ppw-1(ne4428[3xflag::ppw-1])I      | WM622       | This study                  |
| wago-8(ne4432[3xflag::wago-8])V    | WM623       | This study                  |
| hrde-1(ne4437[3xflag::hrde-1])III  | WM624       | This study                  |
| wago-10(ne4430[3xflag::wago-10])V  | WM625       | This study                  |
| wago-11(ne4614[3xflag::wago-11])II | WM626       | This study                  |
| nrde-3(ne4615[3xflag::nrde-3])X    | WM627       | This study                  |
| rde-1(ne4616[3xflag::rde-1])V      | WM628       | This study                  |
| ergo-1(ne4617[3xflag::ergo-1])V    | WM629       | This study                  |
