# Supplementary material
Source: publisher figshare collection journal article supplement (https://gsajournals.figshare.com/articles/dataset/_/7007981)
Supplement: Supplementary file 3 [file 1]

**Table S2:** Efficiencies of long donor integration. Lengths (in bp) refer to length of homology arms.

Hybrid type refers to illustrations in Figure 3 A and B.

| Locus         | Donor type     | F1 rollers |              |
|---------------|----------------|------------|--------------|
|               |                | Screened   | GFP/mCherry+ |
| <i>gcna-1</i> | 120bp blunt    | 26         | 1 (3.85%)    |
|               | 60bp hybrid B  | 24         | 4 (16.67%)   |
|               | 120bp hybrid A | 24         | 5 (20.83%)   |
|               | 120 hybrid B   | 48         | 12 (25.0%)   |
| <i>dvc-1</i>  | 120bp blunt    | 43         | 1 (2.33%)    |
|               | 60bp hybrid B  | 19         | 0 (0%)       |
|               | 120bp hybrid A | 24         | 4 (16.67%)   |
|               | 120 hybrid B   | 28         | 5 (17.86%)   |
| <i>top-2</i>  | 120bp blunt    | 23         | 1 (4.35%)    |
|               | 60bp hybrid B  | 32         | 1 (3.13%)    |
|               | 120bp hybrid A | 24         | 2 (8.33%)    |
|               | 120 hybrid B   | 25         | 7 (28.0%)    |
